# Supplementary material for: Cu–EGaIn enabled stretchable e-skin for interactive electronics and CT assistant localization
Source: Royal Society of Chemistry journal article supplement (doi:10.1039/c9mh02066g), 2020-01-01
Supplement: c9mh02066g5.pdf [file c9mh02066g5.pdf]

## Supporting Information

### Cu-EGaIn Enabled Highly Conductive and Stretchable E-skin for Wearable

#### Electronics and CT Assistant Localization

Rui Guo,\* Bixiao Cui,\* Xiaojing Zhao, Minghui Duan, Xuyang Sun, Ruiqi Zhao, Lei Sheng, Jing Liu,\* Jie Lu\*

**Movie S1:** Fabrication of E-skin.

**Movie S2:** Stretchable E-skin.

**Movie S3:** Functional E-skin Circuits.

**Movie S4:** Thermochromic E-skin.

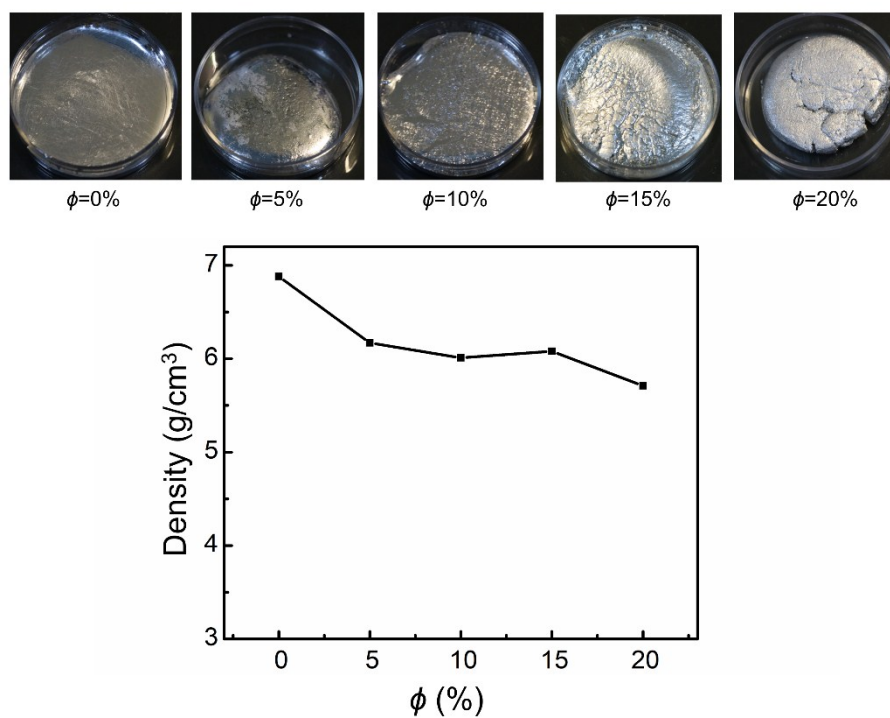

**Fig. S1.** Photos of Cu-EGaIn of different packing ratios  $\phi$ .

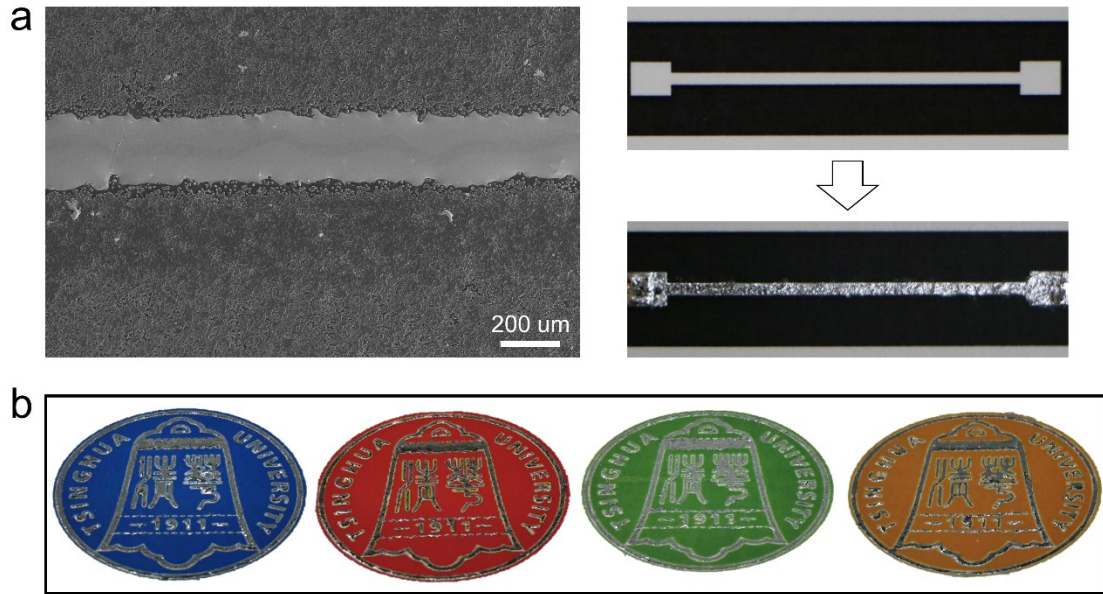

**Fig. S2.** a) SEM and optical images of Cu-EGaIn printed on PMA film. b) Photos of Cu-EGaIn printed on PMA film covered with different color toner.

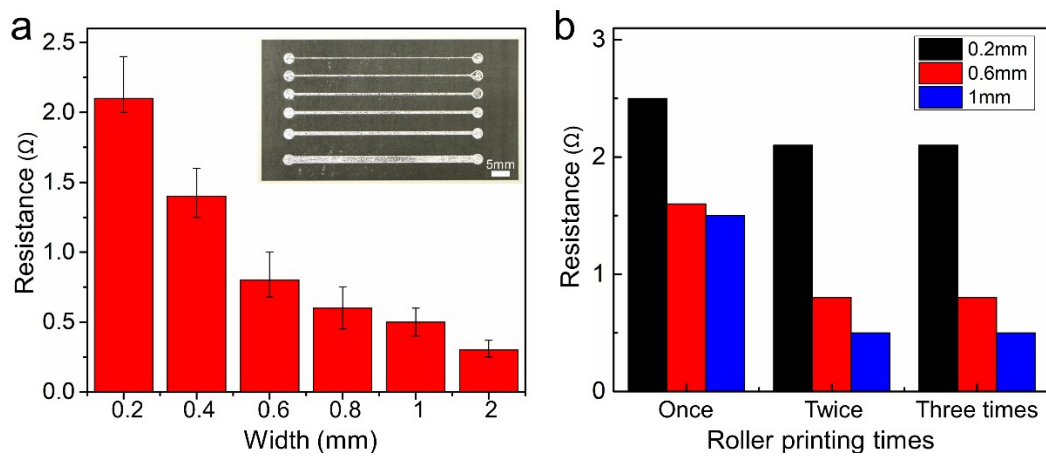

**Fig. S3.** a) Resistance of different widths of Cu-EGaIn lines ( $n = 4$ ). b) The resistances of these Cu-EGaIn lines (width of 0.2mm, 0.6mm and 1mm) after once, twice and three times roller printing.

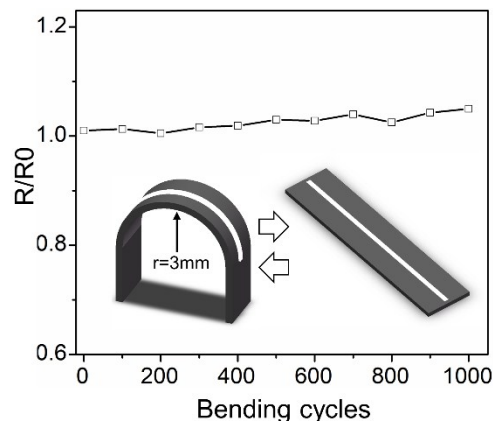

**Fig. S4.** Resistance of Cu-EGaIn line under bend radius of 3 mm for 1000 cycles.

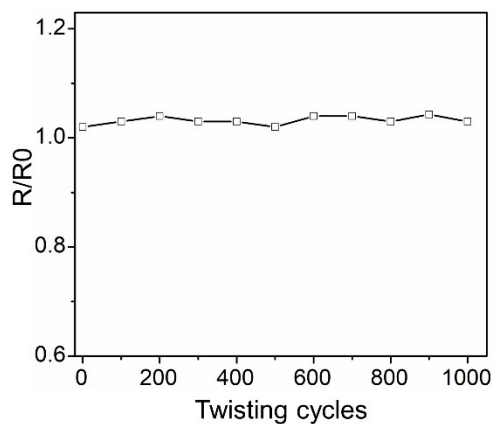

**Fig. S5.** Resistance of Cu-EGaIn line under twisting angle of  $180^\circ$  for 1000 cycles.

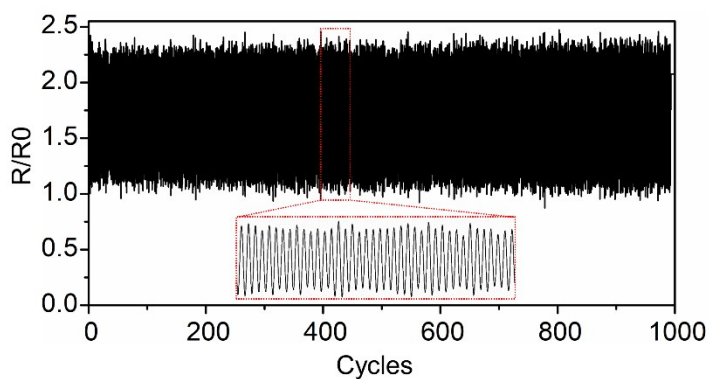

**Fig. S6.** Resistance of Cu-EGaIn line with strain of 20% for 1000 cycles.

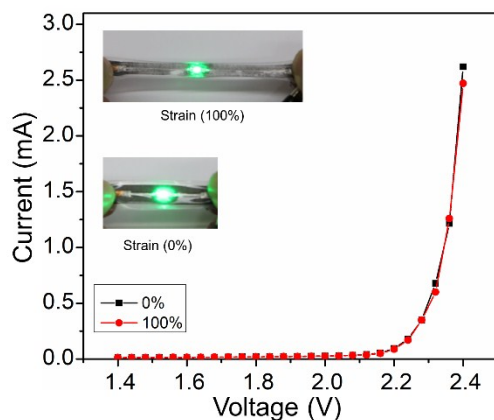

**Fig. S7.** I-V curves of the Cu-EGaIn lines with LED under various strains.

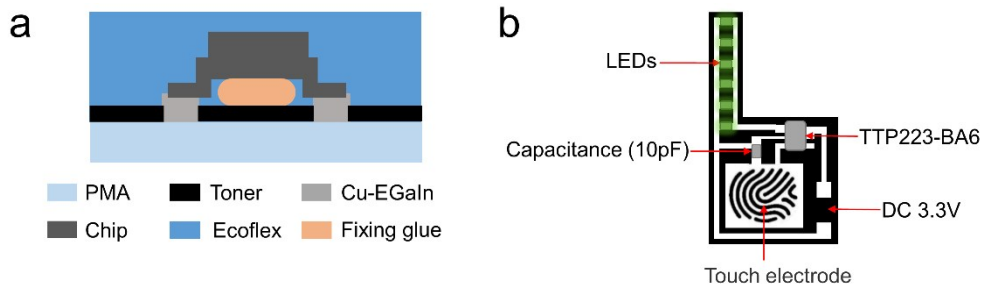

**Fig. S8.** a) The structure details of the chip junction. b) Circuit diagram of the interactive circuit.

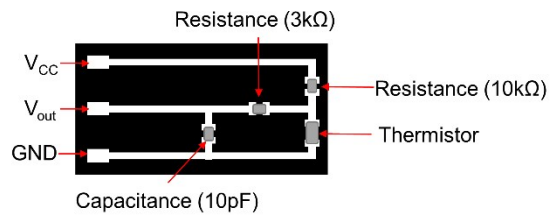

**Fig. S9.** Circuit diagram of the temperature monitoring circuit.

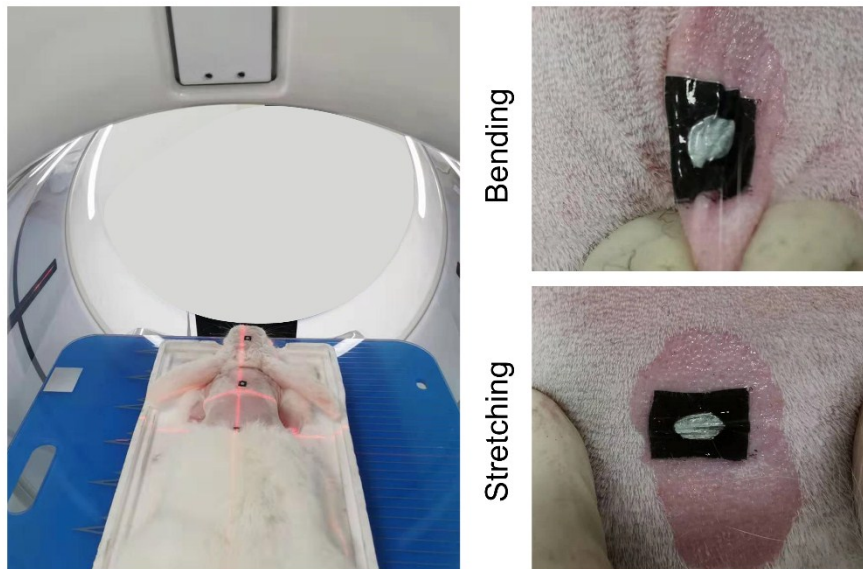

**Fig. S10.** The images of CT assistant localization marker on a white rabbit.

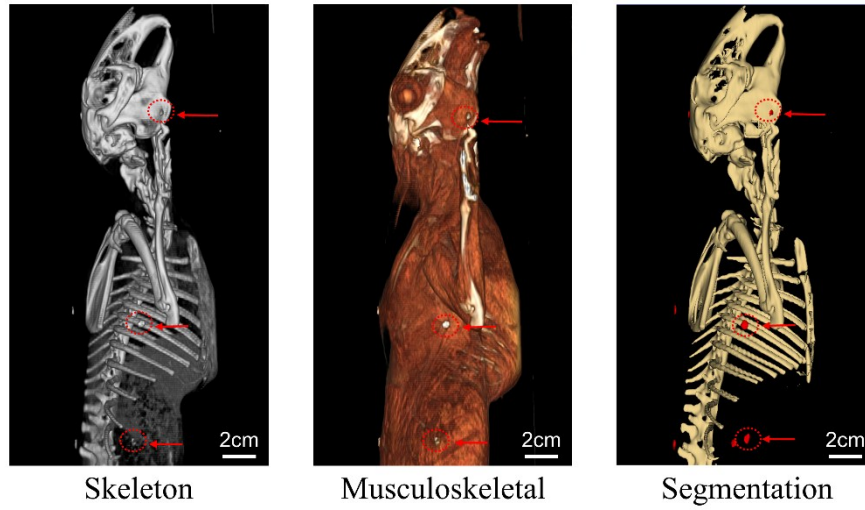

**Fig. S11.** The VR lateral views of CT images (musculoskeletal structure and skeleton with segmentation of the markers) about the rabbit.

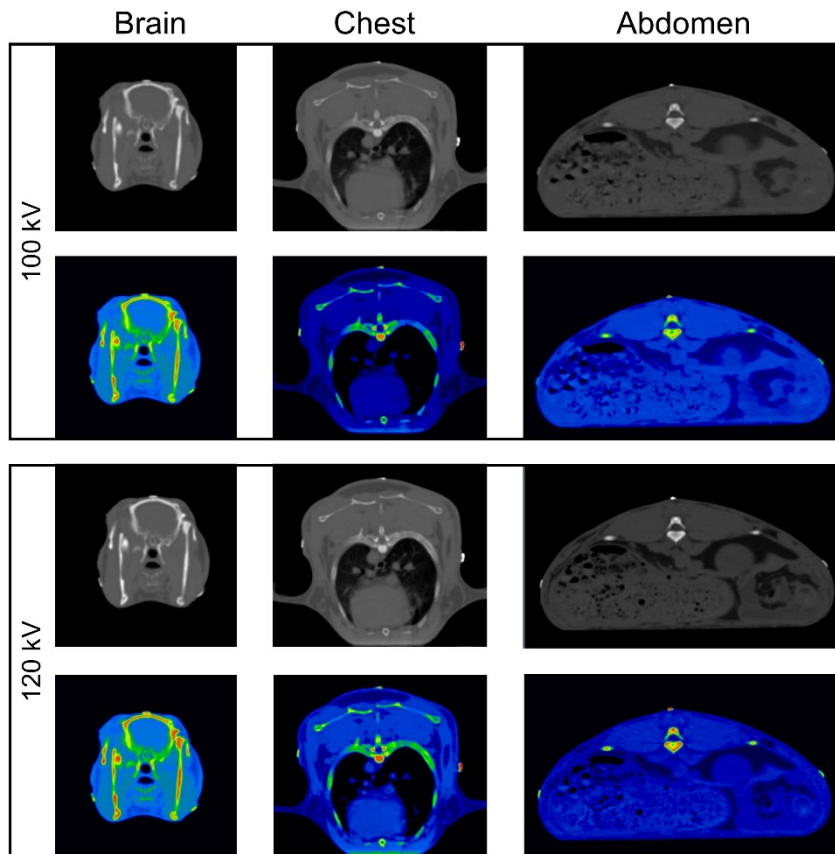

**Fig. S12.** The CT images of the rabbit with the same markers at 100 kV and 120 kV.
